# Supplementary material
Source: PubMed Central journal article supplement (PMC3749779)

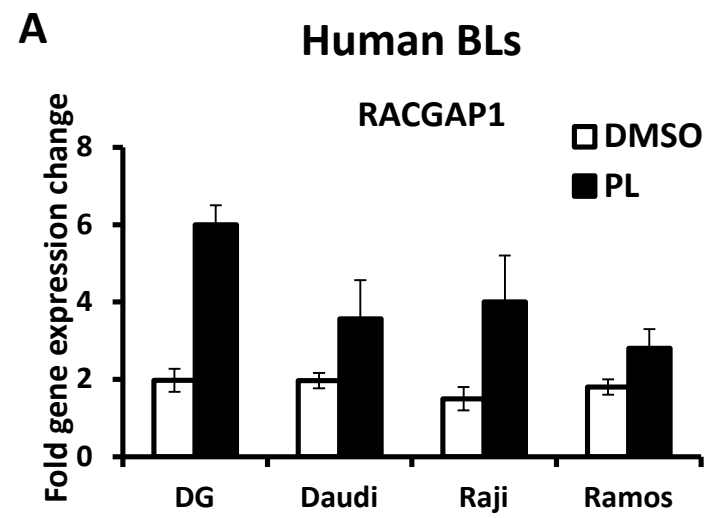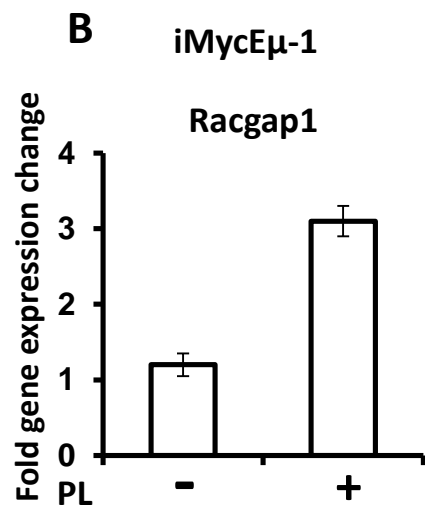

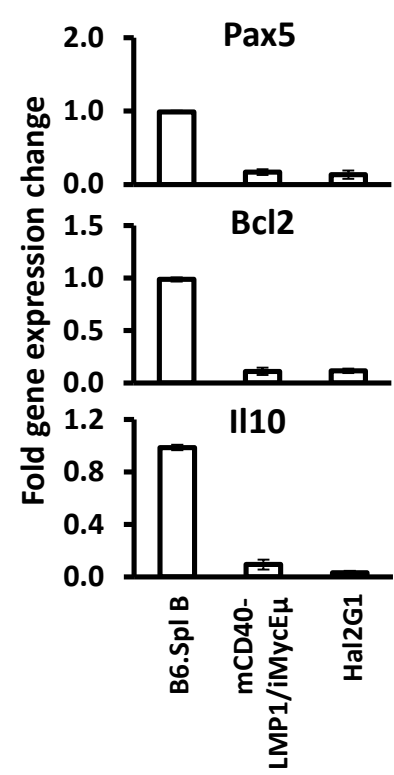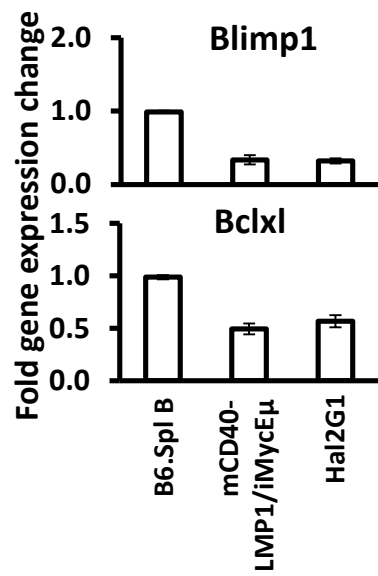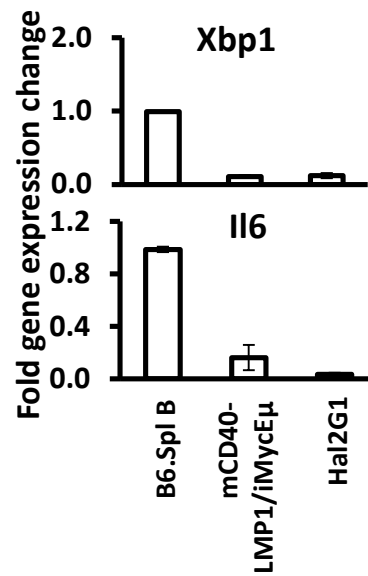

**A**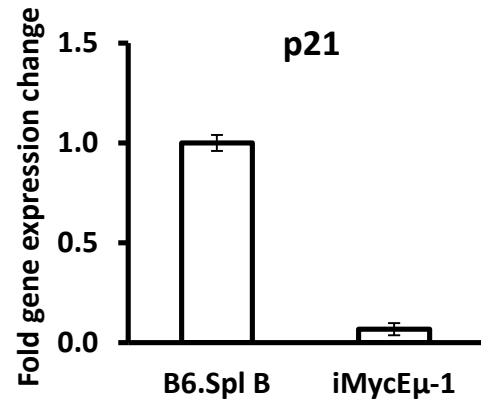**B**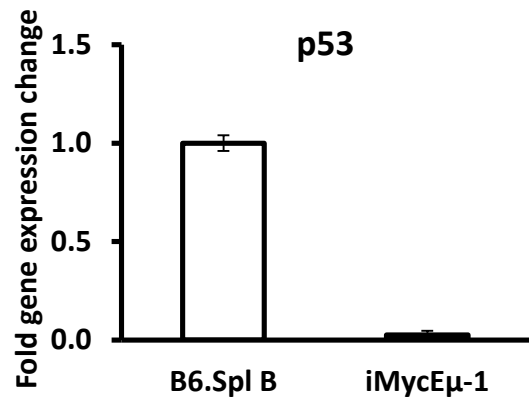

Supplement: NIHMS491519-supplement-02.pdf [file NIHMS491519-supplement-02.pdf]
